# Supplementary material for: Elucidating role of salivary proteins in denture stomatitis using a proteomic approach
Source: Royal Society of Chemistry journal article supplement (doi:10.1039/c2mb25283j), 2012-08-21
Supplement: c2mb25283j.pdf [file c2mb25283j.pdf]

**Supplementary Table 1 Masses identified by LC-MS/MS and MALDI-TOF/MS**

| MW by SELDI | Candidate Protein ID (Swiss Prot or NCBI accession number) | Score                                                   | Expected Value           | Peptide <sup>#</sup>                                                                                                                                                                                                                                                                                                                                                                                                                                                                                                                                                                                                                                                                                                                                                                                                         |
|-------------|------------------------------------------------------------|---------------------------------------------------------|--------------------------|------------------------------------------------------------------------------------------------------------------------------------------------------------------------------------------------------------------------------------------------------------------------------------------------------------------------------------------------------------------------------------------------------------------------------------------------------------------------------------------------------------------------------------------------------------------------------------------------------------------------------------------------------------------------------------------------------------------------------------------------------------------------------------------------------------------------------|
| 3822        | STAT_Human                                                 | 13                                                      | 1.5E+03 <sup>&amp;</sup> | IGRFGYGYGPYQPVEQPLYPQPYQPQY<br>QQYT                                                                                                                                                                                                                                                                                                                                                                                                                                                                                                                                                                                                                                                                                                                                                                                          |
|             |                                                            |                                                         |                          | MKLITILFLC SRRLLSLTQE SQSEEIDCND<br>KDLFKAVDAA LKKYNSQNQS<br>NNQFVLYRIT EATK <b>TVGSDT FYSFK</b> YEIKE<br>GDCPVQSGKT WQDCEYKDA<br>KAATGECTAT VGKRSSTKFS<br>VATQTCQITP AEGPVVTAQY<br>DCLGCVHPIS TQSPDLEPIL<br>RHGIQYFNNT QHSSLFMLN<br>EVKRAQRQVV AGLNFRITYS<br>IVQTNCSKEN FLFLTPDCKS<br>LWNGDTGECT DNAYIDIQLR<br>IASFSQNCDI YPGKDFVQPP<br>TKICVGCPRD IPTNSPELEE TLHTITKLN<br>AENNATFYFK IDNVKKARVQ<br>VVAGKKYFID FVARETTCSK<br>ESNEELTESC ETKKLGQSLD<br>CNAEVYVVPW EKKIYPTVNC<br>QPLGMISLMK RPPGFSPFRS SRIGEIKEET<br>TVSPHTSMA PAQDEERDSG<br>KEQGHTRRHD WGHEKQRKHN<br>LGHGKHHERD QGHGHRGQHG<br>LGHGHEQQHG LGHGKFKLD<br>DDLEHQGGHV LDHGKHKHKG<br>HGHGKHKNKG KKNKGKHWK<br>TEHLASSED STTPSAQTQE<br>KTEGPTPIPS LAKPGVTVTF<br>SDFQSDLIA TMMPPISPAP<br>IQSDDDWIPD IQIDPNGLSF NPISDFPDTT<br>SPKCPGRPWK SVSEINPTTQ<br>MKESYYFDLT DGLS |
| 5227        | KNG1_Human                                                 | 60                                                      | 43                       |                                                                                                                                                                                                                                                                                                                                                                                                                                                                                                                                                                                                                                                                                                                                                                                                                              |
| 7146.5      | CYTN_Human                                                 | 297                                                     | 55                       | MAQHLSTLLL LLATLAVALA<br>WSPK <b>EEDRII PGGIYNADLN DEWVQRALHF</b><br><b>AISEYNK</b> ATK DDYYRRPLRV<br>LRAR <b>QQTVGG VNYFFDVEVG RTICTKSQPN</b><br><b>LDTCAFHEQP ELQKKQLCSF EIYVPEWNR</b><br><b>RSLVKSRCQE S</b>                                                                                                                                                                                                                                                                                                                                                                                                                                                                                                                                                                                                              |
| 10827       | unknown IG variable region                                 | Multiple hits for IG variable regions with scores > 100 | 71                       |                                                                                                                                                                                                                                                                                                                                                                                                                                                                                                                                                                                                                                                                                                                                                                                                                              |
| 12585.1     | KV206_Human or possible unknown IG variable region         | 131                                                     | 44                       | MRLPAQLLGL LMLWVPGSSG<br><b>DVVMTQSPLS LPVTLGQPAS ISCRSSQSLV</b><br>YSDGNTYLNW FQQRPGQSPR<br>RLIYKVSNRD SGVPDRFSGS<br>GSGTDFTLKI SRVEAEDVGV<br>YYCMQGTHWS WTFQGQTKVE IKR                                                                                                                                                                                                                                                                                                                                                                                                                                                                                                                                                                                                                                                     |

|         |                                                                          |        |    |                                                                                                                                                                                                                                                                                                                                                          |
|---------|--------------------------------------------------------------------------|--------|----|----------------------------------------------------------------------------------------------------------------------------------------------------------------------------------------------------------------------------------------------------------------------------------------------------------------------------------------------------------|
| 12588.8 | KV404_Human,<br>KV206_Human or<br>possible unknown IG<br>variable region | 73/131 | 44 | MVLQTQVFIS LLLWISGAYG<br><b>DIVMTQSPDS LAVSLGER</b> AT INCKSSQSIL<br>YSSDNKNYLA WYQQKPGQPP<br>KLLIWASTR ESGVPDRFSG<br>SSGTDFTLT ISSLQAEDVA<br>VYYCQQYYNL PWTFGQGTKV EIKR<br><br>MRLPAQLLGL LMLWVPGSSG<br><b>DVVMTQSPLS LPVTLGQPAS ISCRSSQSLV</b><br>YSDGNTYLNW FQQRPGQSPR<br>RLIYKVSNRD SGVPDRFSGS<br>GSGTDFTLKI SRVEAEDVGV<br>YYCMQGTHWS WTFGQGTKVE IKR |
| 12607.8 | gi 15777209 or<br>possible unknown IG<br>variable region                 | 67     | 57 | SCYWMSWVRQ APGKGLEWVA<br>NIKXDGSEKY YVDSVKGRFT<br>XSR <b>DNAKNSL XLQMNSLRAE</b><br>DTXXYYCXRG NIXVVPAAALY<br>ARGLLLXYGR XXPRXHGHL<br>LSIPDQPQGL                                                                                                                                                                                                          |

|         |                            |                                                        |    |                                                                                                                                                                                                                                                                                                                                                                                                                                                                                                                                                                                                                                                                                                                                                                                                                                                                                                                                                                                                                                                                                                                                                                                                                                                                                                                                                                                                                                                                                                                                                                                                                                                                                                                                                                                                                                                                                                                                                                                                                                                                                                                                                        |
|---------|----------------------------|--------------------------------------------------------|----|--------------------------------------------------------------------------------------------------------------------------------------------------------------------------------------------------------------------------------------------------------------------------------------------------------------------------------------------------------------------------------------------------------------------------------------------------------------------------------------------------------------------------------------------------------------------------------------------------------------------------------------------------------------------------------------------------------------------------------------------------------------------------------------------------------------------------------------------------------------------------------------------------------------------------------------------------------------------------------------------------------------------------------------------------------------------------------------------------------------------------------------------------------------------------------------------------------------------------------------------------------------------------------------------------------------------------------------------------------------------------------------------------------------------------------------------------------------------------------------------------------------------------------------------------------------------------------------------------------------------------------------------------------------------------------------------------------------------------------------------------------------------------------------------------------------------------------------------------------------------------------------------------------------------------------------------------------------------------------------------------------------------------------------------------------------------------------------------------------------------------------------------------------|
| 12608.4 | DSC2_Human                 | 107                                                    | 55 | <p>                     MEAARPSGSW NGALCRLLLL<br/>                     TLAILIFASD ACKNVTLHVP<br/>                     SKLDAEKLVG RVNLKECFDA<br/>                     ANLIHSSDPD FQILEDGSVY TTNTILLSSE<br/>                     KRSFTILLSN TENQEKKKIF<br/>                     VFLEHQTKVL KKRHTKEKVL<br/>                     RRAKRRWAPI PCSMLENSLG<br/>                     PFPLFLQQVQ SDTAQNYTIY<br/>                     YSIRGPGVDQ EPRNLFYVER<br/>                     DTGNLYCTRP VDREQYESFE<br/>                     IIAFATTPDG YPELPLPLI IKIEDENDNY<br/>                     PIFTEETYTF TIFENCRVGT<br/>                     TVGQVCATDK DEPDTMHTRL<br/>                     KYSIIGQVPP SPTLFSMHPT<br/>                     TGVITTTSSQ LDRELIDKYQ<br/>                     LKIKVQDMDG QYFGLQTTST<br/>                     CIINIDDVND HLPFTFRYSY<br/>                     VTSVEENTVD VEILRVTVED<br/>                     KDLVNTANWR ANYTILKGNE<br/>                     NGNFKIVTDA KTNEGVLCVV<br/>                     KPLNYEEKQQ MILQIGVVNE<br/>                     APFSREASPR SAMSTATVTV<br/>                     NVEDQDEGPE CNPPIQTVRM<br/>                     KENAEVGTTS NGYKAYDPET<br/>                     RSSSGIRYKK LTDPTGWVTI<br/>                     DENTGSIKVF RSLDREAETI<br/>                     KNGIYNITVL ASDQGGRTCT<br/>                     GTLGILQDV NDNSPFIPK <b>K TVIICKPTMS</b><br/> <b>SAEIVA</b>VDPD EPIHGPPDF SLESSTSEVQ<br/>                     RMWRLKAIND TAAR <b>LSYQND PPFGSYVVI</b><br/> <b>TVR</b>DRLGMSS VTSLDVTLCD<br/>                     CITENDCTHR VDPRIGGGGV<br/>                     QLGKWAILAI LLGIALLCI<br/>                     LFTLVCGASG TSKQPKVIPD<br/>                     DLAQQNLIVS NTEAPGDDKV<br/>                     YSANGFTTQT VGASAQGVCG<br/>                     TVGSGIKNGG QETIEMVKGK<br/>                     HQTSESCRGA GHHHTLDSCR<br/>                     GGHTEVDNCR YTYSEWHSFT<br/>                     QPRLGEKVYL CNQDENHKHA<br/>                     QDYVLTYNYE GRGSVAGSVG<br/>                     CCSERQEEDG LEFLDNLEPK<br/>                     FRTLAEACMKR                 </p> |
| 12680   | unknown IG variable region | Multiple hits for IG variable regions with scores > 71 | 71 |                                                                                                                                                                                                                                                                                                                                                                                                                                                                                                                                                                                                                                                                                                                                                                                                                                                                                                                                                                                                                                                                                                                                                                                                                                                                                                                                                                                                                                                                                                                                                                                                                                                                                                                                                                                                                                                                                                                                                                                                                                                                                                                                                        |
| 13267.3 | gi 239741695               | 57                                                     | 56 | <p>                     MVNPTMFFHI AVDGEPLGCV<br/>                     SFELFADKVP KTAENFHALS<br/>                     TGEKGFYK G SCFHR <b>IIPGF TCQSGDFTRH</b><br/>                     TALVANAKTE WLDCKHVVFV<br/>                     KVKDGMNIVE VMEHLGSKNG<br/>                     KISNQEDHH C                 </p>                                                                                                                                                                                                                                                                                                                                                                                                                                                                                                                                                                                                                                                                                                                                                                                                                                                                                                                                                                                                                                                                                                                                                                                                                                                                                                                                                                                                                                                                                                                                                                                                                                                                                                                                                                                                                                 |

|         |                                                           |     |    |                                                                                                                                                                                                                                                                                                                                                                                                             |
|---------|-----------------------------------------------------------|-----|----|-------------------------------------------------------------------------------------------------------------------------------------------------------------------------------------------------------------------------------------------------------------------------------------------------------------------------------------------------------------------------------------------------------------|
| 13274.1 | CAH6_Human                                                | 68  | 44 | MRALVLLLSL FLLGGQAQHV<br>SDWTYSEGAL DEAHWPQHYP<br>ACGGQRQSPI NLQRTKVRYN<br>PSLKGLNMTG YETQAGEFPM<br>VNNGHTVQIS LPSTMRMTVA<br>DGTVYIAQQM HFHWGGASSE<br>ISGSEHTVDG IRHVIEIHIV HYNISKYK <b>SYD</b><br><b>IAQDAPDGLA VLA AFVEVK</b> N YPENTYYSNF<br>ISHLANKYP GQRTTLTGLD<br>VQDMLPRNLQ HYYTYHGS LT<br>TPPCTENVHW FVLADFVKLS<br>RTQVWKLENS LLDHRNKTIH<br>NDYRRQTPLN HRVVESNFPN<br>QEYTLGSEFQ FYLHKIEEIL DYLRRALN |
| 13274.1 | gi 239741695                                              | 57  | 56 | MVNPTMFFHI AVDGEPLGCV<br>SFELFADKVP KTAENFHALS<br>TGEKGFYK G SCFHR <b>IIPGF TCQSGDFTRH</b><br>TALVANAKTE WL DCKHVVF G<br>KVKDGMNIVE VMEHLGSKNG<br>KISNQEDHH C                                                                                                                                                                                                                                               |
| 13274.1 | CYTC_Human                                                | 61  | 55 | MAGPLRAPLL LLAILAVALA<br>VSPAAGSSPG KPPRLVGGPM<br>DASVEEEGVR <b>RALDFAVGEY</b><br><b>NK</b> ASNDMYHS RALQVVRARK<br>QIVAGVNYFL DVELGRITCT<br>KTQPNLDNCP FHDQPHLKRK<br>AFCSFQIYAV PWQGTMTLSK STCQDA                                                                                                                                                                                                           |
| 13469   | HV301_Human, or<br>possible unknown IG<br>variable region | 70  | 44 | <b>QVQLVQSGGG LVKPGGSLR</b> L SCVASGFSFR<br>DFYMSWIRZT PGKGLZWVSY<br>IGGSGSTLYY ADSVKGRFTI<br>SRDNAQKSLY LZMBSLRTZB<br>TAVYYCAATB BFBWSTFSLB<br>YWGZGBLVTV SS                                                                                                                                                                                                                                               |
| 13536   | HV310_Human or<br>possible unknown IG<br>variable region  | 56  | 44 | <b>QVKLVQAGGG VVQPGR</b> SLRL SCIASGFTFS<br>NYGMHWVRQA PGKGLEWVAV<br>IWYNGSRITYY GDSVKGRFTI<br>SRDNSKRTLY MZMNSLR TED<br>TAVYYCARDP DILTA FSFDY<br>WGQGV LVTVS S                                                                                                                                                                                                                                            |
| 13537.5 | HV310_Human or<br>possible unknown IG<br>variable region  | 56  | 44 | <b>QVKLVQAGGG VVQPGR</b> SLRL SCIASGFTFS<br>NYGMHWVRQA PGKGLEWVAV<br>IWYNGSRITYY GDSVKGRFTI<br>SRDNSKRTLY MZMNSLR TED<br>TAVYYCARDP DILTA FSFDY<br>WGQGV LVTVS S                                                                                                                                                                                                                                            |
| 13552.9 | gi 224808232 or<br>possible unknown<br>variable region    | 110 | 71 | MA <b>XVQLVESG GGVVQPGR</b> SL<br>RLSCAASGFT FSKYPFHWVR<br>QAPGKLEWV ATISHDGSNN<br>DYADSVKGRL IISRDNSKNT<br>LYLQMSSLRV EDTAVYYCAR<br>VLGWYGREVD YWGQGT LVTV SS                                                                                                                                                                                                                                              |

|                    |                                                    |     |    |                                                                                                                                                                                                     |
|--------------------|----------------------------------------------------|-----|----|-----------------------------------------------------------------------------------------------------------------------------------------------------------------------------------------------------|
| 13645.2            | HV307_Human or possible unknown IG variable region | 59  | 55 | QVELVESGGG VVZPGRSLRL<br>SCAASGFTFS NYAMHWVRQP<br>PGKGLEWVAV ISYBGBBKYY<br>ABSVKGRFTI SRDBSK <b>BTLY LQMNSLR</b> AEB<br>TAVYYCARDR PLYGBYRAFN<br>YWGQGLVTV SS                                       |
| <sup>d</sup> 15291 | gi 1082553 or possible unknown IG variable region  | 179 | 56 | MRRVQVQDN GELTLWVTFG<br>QGKVEIKR <b>T VAAPSVFIFP</b><br><b>PSDEQLKSGT ASVVCLLNNF YPREAKVQWK</b><br><b>VDNALQSGNS QESVTEQDSK</b><br><b>DSTYLSSTL TSKADYEKH KLYACEVTHQ</b><br><b>GLSSPVTKSF</b> NRGEC |

<sup>d</sup>These biomarkers are down-regulated in CADS groups compared with the control.

# Amino acids presented in bold indicates peptides detected as part of the database search.

The sequences presented here are that of the un-processed protein. In some cases the protein was cleaved or modified as indicated in the database, and it was the mass of the processed form that matched most closely to the SELDI-TOF/MS Mw marker.

<sup>&</sup>This references the statistical cutoff value in these database search algorithms that indicate protein identity or extensive homology

**Supplementary Table 2: Transcriptome Analysis of DES-related and PPIA-related genes\***

| Symbol | Entrez Gene Name                              | p-value  | Fold Change |
|--------|-----------------------------------------------|----------|-------------|
| PPIL2  | peptidylprolyl isomerase (cyclophilin)-like 2 | 3.98E-03 | 1.220       |
| PPIL1  | peptidylprolyl isomerase (cyclophilin)-like 1 | 1.07E-06 | 1.339       |
| PPIB   | peptidylprolyl isomerase B (cyclophilin B)    | 5.35E-06 | 1.343       |
| PPIF   | peptidylprolyl isomerase F                    | 3.94E-03 | 1.430       |

\*Biopsy samples from denture stomatitis affected and unaffected areas in the oral mucosa were processed for RNA extraction and gene expression profiling was performed using Affymetrix (Affymetrix Inc., Santa Clara, CA) recommended procedure and analyzed using Partek and IPA softwares. To determine the integrity of the RNA isolated from biopsies samples, all RNA samples were analyzed using Agilent 2100 Bioanalyzer. The RNA Integrity Number (RIN), that was developed to remove individual interpretation in RNA quality control, is obtained through a software algorithm that allows for the classification of riboeukaryotic total RNA, based on a numbering system from 1 to 10, with 1 being the most degraded profile and 10 being the most intact. In this way, interpretation of an electropherogram is facilitated, enabling comparison of samples. As can be seen in the figure above the RIN values typically were between 9.3 and 10. All samples had RNA quality exceeding the minimal cut-point of RIN=8.0 for whole transcriptome Affymetric array analyses. The quality control of the Affymetrix arrays demonstrated excellent signals for all arrays used. SAM analyses using a FDR of  $P < 0.05$  was utilized. Note that only PPIA-related genes are presented here.
